# Supplementary material for: The Pivotal Roles of US3 Protein in Cell-to-Cell Spread and Virion Nuclear Egress of Duck Plague Virus
Source: PubMed Central journal article supplement (PMC7189242; doi:10.1038/s41598-020-64190-2), 2020-04-28

# The Pivotal Roles of US3 Protein in Cell-to-Cell Spread and Virion Nuclear

## Egress of Duck Plague Virus

Liyao Deng<sup>1,2,3†</sup>, Mingshu Wang<sup>1,2,3†\*</sup>, Anchun Cheng<sup>1,2,3\*</sup>, Qiao Yang<sup>1,2,3</sup>, Ying Wu<sup>1,2,3</sup>, Renyong Jia<sup>1,2,3</sup>, Shun Chen<sup>1,2,3</sup>, Dekang Zhu<sup>2,3</sup>, Mafeng Liu<sup>1,2,3</sup>, Xinxin Zhao<sup>1,2,3</sup>, Shaqiu Zhang<sup>1,2,3</sup>, Juan Huang<sup>1,2,3</sup>, Xumin Ou<sup>1,2,3</sup>, Sai Mao<sup>1,2,3</sup>, Ling Zhang<sup>1,2,3</sup>, Yunya Liu<sup>1,2,3</sup>, Yanling Yu<sup>1,2,3</sup>, Bin Tian<sup>1,3</sup>, Leichang Pan<sup>1,3</sup>, Mujeeb Ur Rehman<sup>1,3</sup> and Xiaoyue Chen<sup>2,3</sup>

<sup>1</sup>Institute of Preventive Veterinary Medicine, Sichuan Agricultural University, Wenjiang 611130, People's Republic of China.

<sup>2</sup>Avian Disease Research Center, College of Veterinary Medicine of Sichuan Agricultural University, Wenjiang 611130, People's Republic of China.

<sup>3</sup>Key Laboratory of Animal Disease and Human Health of Sichuan Province, Sichuan Agricultural University, Wenjiang 611130, People's Republic of China.

\* Correspondence: chenganchun@vip.163.com, mshwang@163.com

† These authors contributed equally to this work

**Fig. 2a.** Identification of recombinant pBACs by PCR analysis.

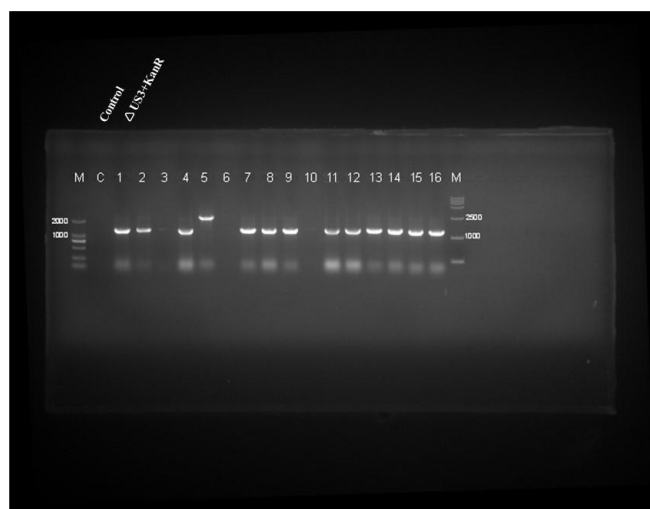

Identification of pBAC-CHV- $\Delta$ US3 (Lane 1 and 2)

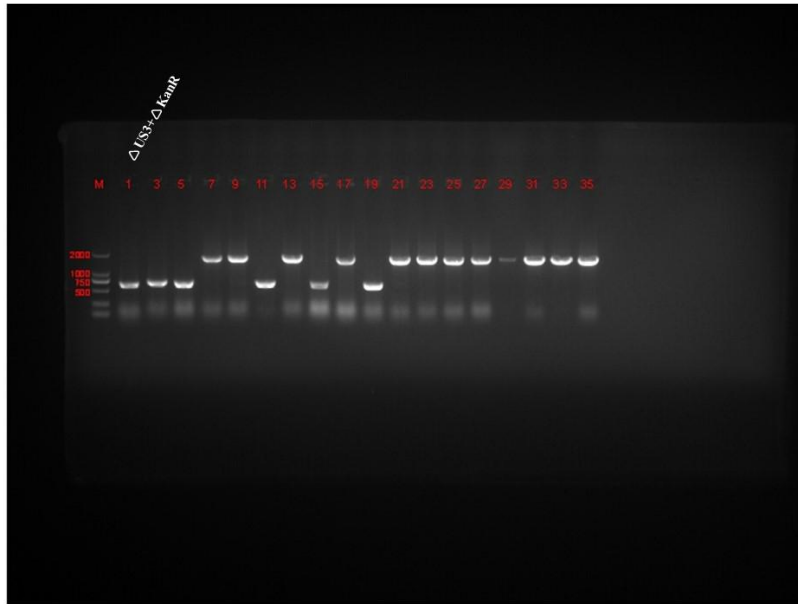

Identification of pBAC-CHv- $\Delta$ US3 (Lane 3)

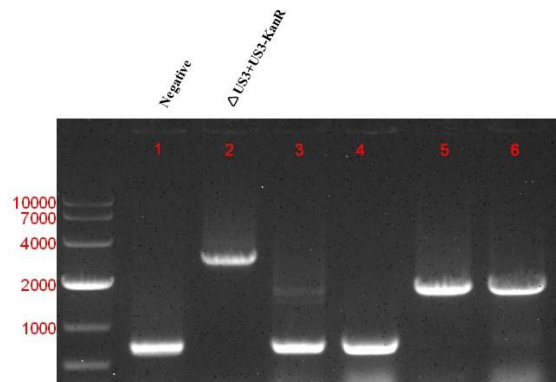

Identification of pBAC-CHv- $\Delta$ US3R (Lane 4 and 5)

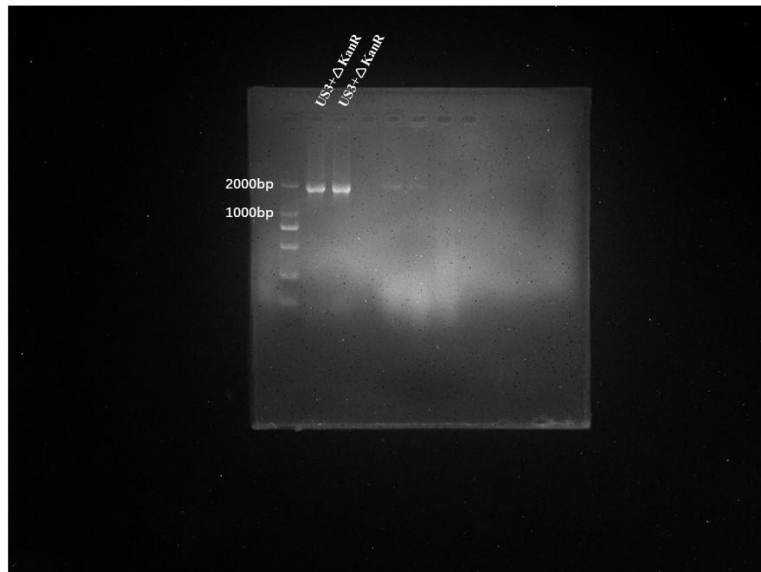

Identification of pBAC-CHv- $\Delta$ US3R (Lane 6)

**Fig. 2c.** The observed DEF cells at 6 d after pBAC-CHv- $\Delta$ US3R transfection.

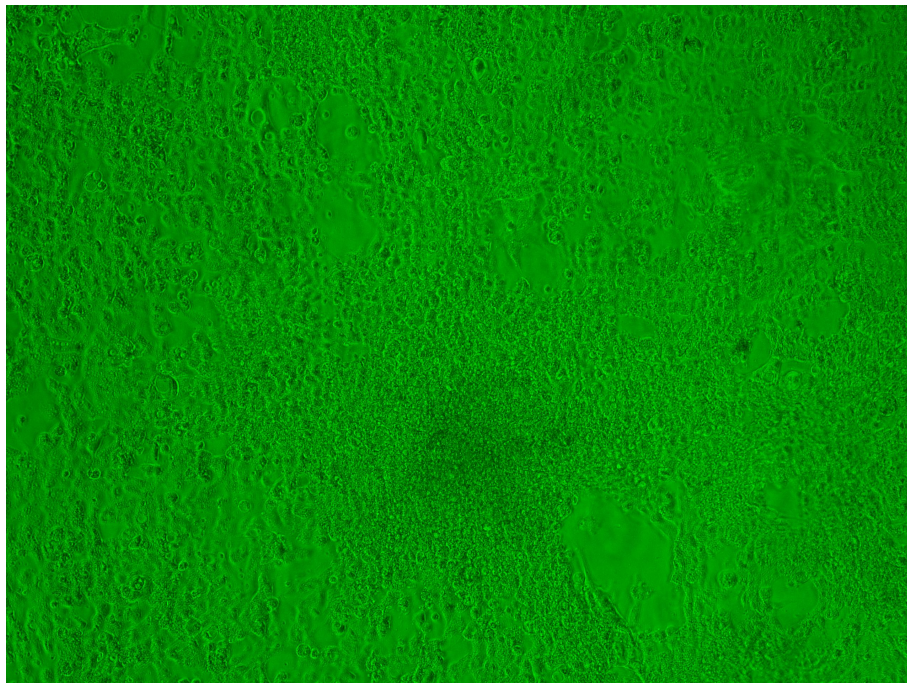

**Fig. 2d.** Identification of recombinant viruses by PCR analysis.

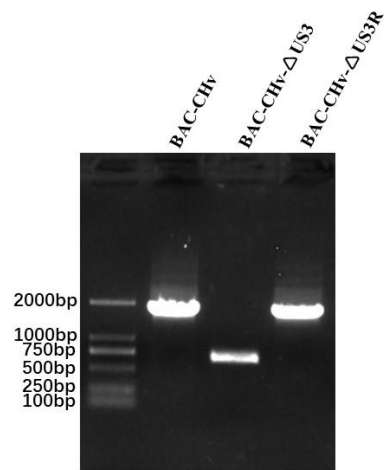

**Fig. 2e.** Western blot analysis of US3 protein expression of recombinant viruses.

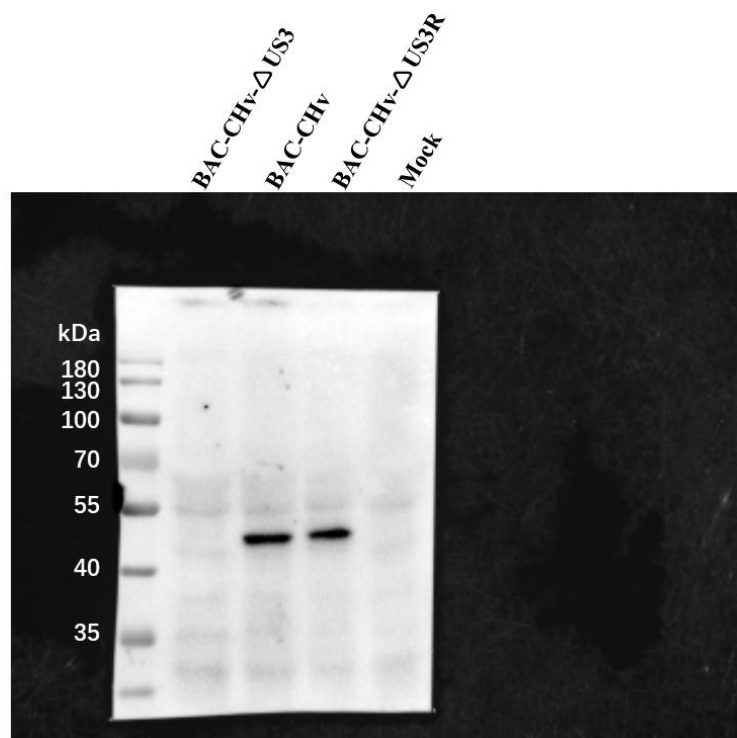

The protein expression of US3 (50kDa)

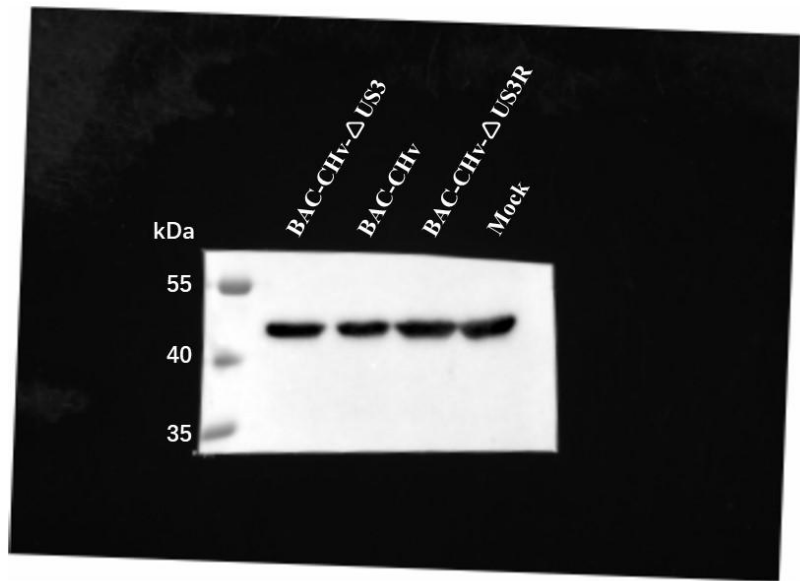

The protein expression of  $\beta$ -actin (42kDa, as a control)

**Fig. 4d.** Images of viral plaques after 1.5% crystal violet staining.

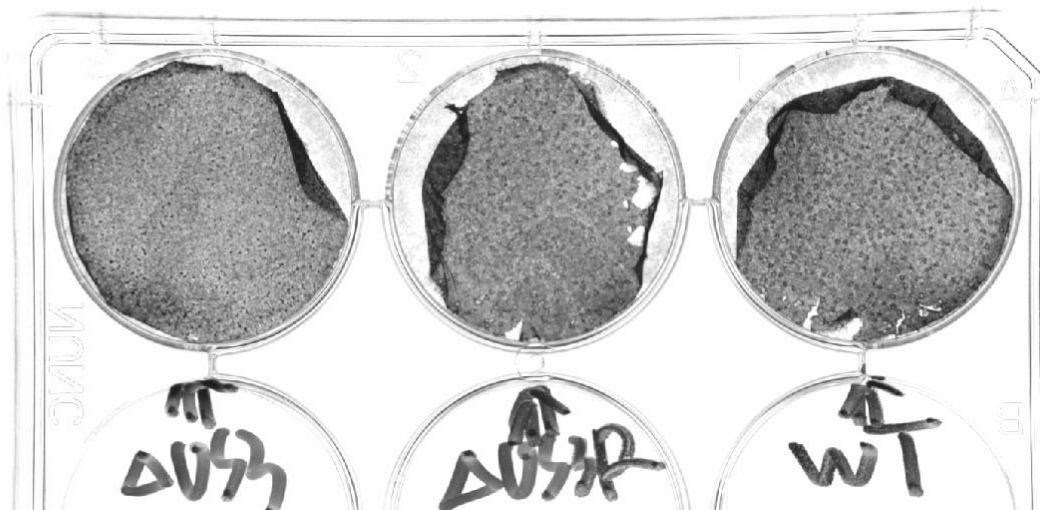

Supplement: 41598_2020_64190_MOESM1_ESM.pdf [file 41598_2020_64190_MOESM1_ESM.pdf]
